# Supplementary material for: Identification of clinical implications and potential prognostic models of chromatin regulator mutations in multiple myeloma
Source: PubMed Central journal article supplement (PMC9308335; doi:10.1186/s13148-022-01314-7), 2022-07-23
Supplement: 13148_2022_1314_MOESM2_ESM.pdf [file 13148_2022_1314_MOESM2_ESM.pdf]

ADAM29  
ADAR  
ADAMTS9  
AHNAK2  
AKT1  
ALK  
ANK2  
AP3B2  
APC  
APOBEC1  
APOBEC2  
APOBEC3A  
APOBEC3B  
APOBEC3C  
APOBEC3D  
APOBEC3F  
APOBEC3G  
APOBEC3H  
APOBEC4  
ARID1A  
ARID1B  
ARID2  
ARID3A  
ARID3B  
ARID3C  
ARID4A  
ARID4B  
ARID5A  
ARID5B  
ASAP2  
ASB15  
ASCC3  
ASXL1  
ATF7IP  
ATM  
ATN1  
ATP13A4  
ATP2A1  
ATP2A2  
ATP2A3  
ATR  
ATXN1  
ATXN3  
B2M  
BAGE2  
BCL2  
BCL6  
BCOR  
BIRC2  
BIRC3  
BLM

BRAF  
BRCA1  
BRCA2  
BRIP1  
BTK  
BUB1B  
C11orf30  
C2orf50  
CACNA1I  
CARD11  
CARD9  
CASP8  
CBL  
CCDC144NL  
CCDC148  
CCDC39  
CCNB1  
CCND1  
CCND2  
CCND3  
CCNT1  
CD27  
CD40  
CD79A  
CD79B  
CDC73  
CDK4  
CDK6  
CDK7  
CDKN1B  
CDKN2A  
CDKN2C  
CELA1  
CELSR1  
CHD8  
CHEK2  
CIC  
CIDEA  
CMYA5  
COL2A1  
CPXCR1  
CRBN  
CREBBP  
CSMD1  
CSMD3  
CSNK2A1  
CTNNA1  
CUL4A  
CUL4B  
CXCR4  
CYLD

CYP26A1  
DDB1  
DDX11  
DDX3X  
DEFB112  
DENND4A  
DICER1  
DIS3  
DMD  
DNAH11  
DNAH5  
DNAH9  
DNMT3A  
DTX1  
DUSP2  
E2F4  
EGFR  
EGR1  
EIF4G2  
EP300  
EP400  
EPHA3  
ERBB3  
ERN1  
ETV1  
ETV6  
EZH2  
FAM166B  
FAM46C  
FANCA  
FANCD2  
FAT1  
FAT2  
FAT3  
FAT4  
FBN2  
FBXW7  
FGFR1  
FGFR2  
FGFR3  
FLT1  
FLT3  
FN1  
FOXA2  
FOXP1  
FRG1B  
FRYL  
FTSJ3  
GATA6  
GNAS  
GPC5

GPR180  
GRB2  
HDAC2  
HECW1  
HIST1H1C  
HIST1H1D  
HIST1H1E  
HIST1H2AG  
HLA-DQA1  
HMCN1  
HOXA9  
HRAS  
IARS2  
ID3  
IDH1  
IDH2  
IDH3A  
IFNGR2  
IGF1R  
IGF2R  
IGLL5  
IKZF1  
IKZF3  
IL6  
IL6R  
IL6ST  
IRF4  
JAK2  
JARID2  
KDM5A  
KDM5B  
KDM5C  
KDM5D  
KDM6A  
KDM6B  
KDR  
KIAA1462  
KLHL6  
KMT2A  
KMT2B  
KMT2C  
KMT2D  
KMT2E  
KRAS  
LAMA3  
LEPR  
LINGO1  
LOC96610  
LRP1B  
LRP2  
LRRK2

LTB  
LTBR  
LTN1  
LYST  
MAF  
MAFB  
MAGED1  
MAGI1  
MAML2  
MAMLD1  
MAP2K2  
MAP2K4  
MAP3K1  
MAP3K14  
MAP3K4  
MAP3K9  
MAP4K4  
MAPK9  
MAST4  
MAX  
MGA  
MYC  
MDM4  
MECOM  
MED12  
MEGF6  
MIA2  
MKI67  
MLH1  
MPDZ  
MPEG1  
MPL  
MPRIP  
MRE11A  
MUC16  
MUC17  
MUC2  
MUC4  
MUTYH  
MYCN  
MYD88  
NBPF1  
NCKAP5  
NCOR1  
NCOR2  
NEB  
NF1  
NFE2L2  
NFKB1  
NFKB2  
NFKBIA

NFKB1B  
NOTCH1  
NOTCH2  
NOTCH3  
NOTCH4  
NR3C1  
NRAS  
NTRK2  
NXF1  
OBSCN  
ODZ2  
OR4C3  
PBRM1  
PCLO  
PDGFRB  
PDIA4  
PEG3  
PI4KA  
PIK3C2G  
PIK3CA  
PIK3CB  
PKHD1  
PLCB4  
PLCE1  
PNRC1  
POT1  
PPM1D  
PRDM1  
PRDM16  
PRDM9  
PRKD2  
PRUNE2  
PSMA1  
PSMB5  
PSMB8  
PSMB9  
PSMD1  
PSMG2  
PTEN  
PTPN11  
PTPRD  
PTPRK  
PTPRT  
PTPRZ1  
RAD18  
RAG2  
RAPGEF4  
RASA2  
RB1  
RET  
RIPK1

RIPK4  
RNF213  
ROBO1  
ROBO2  
ROS1  
RPL11  
RPL14  
RPL17  
RPL5  
RUNX1  
RUNX2  
RYR2  
RYR3  
SALL2  
SCN9A  
SETD2  
SF3B1  
SHANK2  
SHC1  
SI  
SLC04A1  
SMAD3  
SMARCB1  
SMPDL3A  
SMURF1  
SNX7  
SOX21  
SOX9  
SP140  
SPEN  
SPOP  
SPTAN1  
SPTB  
SQLE  
SRF  
SRRM5  
SRSF1  
SRSF2  
STAT3  
SURF1  
SYNE1  
TBP  
TCF3  
TENM1  
TET2  
TGDS  
TGFBR2  
TIAM1  
TLR4  
TNFRSF13B  
TNFRSF21

TNFSF9  
TNIK  
TOP1  
TP53  
TRAF2  
TRAF3  
TRAF3IP1  
TRIP12  
TSHZ1  
TSHZ3  
TTN  
U2AF1  
U2AF2  
UNC80  
USH2A  
USP29  
USP7  
USP9X  
VCAN  
VSIG8  
WHSC1  
WWOX  
XBP1  
XIRP2  
XP01  
YAP1  
ZFH3  
ZFH4  
ZNF598  
ZRSR2
